# Supplementary material for: Comparison of Freshwater Mussels Unio tumidus and Unio crassus as Biomonitors of Microplastic Contamination of Tisza River (Hungary)
Source: MDPI journal article supplement (doi:10.3390/environments9100122), 2022-09-24
Supplement: s1 [file s1]

Article

# Comparison of Freshwater Mussels *Unio tumidus* and *Unio crassus* as Biomonitors of Microplastic Contamination of Tisza River (Hungary)

Wael Almeshal <sup>1</sup>, Anita Takács <sup>2</sup>, László Aradi <sup>3</sup>, Sirat Sandil <sup>4</sup>, Péter Dobosy <sup>4,5</sup>, and Gyula Záray <sup>4,5,\*</sup>

<sup>1</sup> Doctoral School of Environmental Science, Eötvös Loránd University, 1053 Budapest, Hungary

<sup>2</sup> Institute of Aquatic Ecology, Centre for Ecological Research, 1113 Budapest, Hungary

<sup>3</sup> Lithosphere Fluid Research Laboratory, Department of Petrology and Geochemistry, Institute of Geography and Earth Sciences, Faculty of Science, Eötvös Loránd University, 1053 Budapest, Hungary

<sup>4</sup> Institute of Aquatic Ecology, Centre for Ecological Research, H-1113 Budapest, Hungary

<sup>5</sup> National Laboratory for Water Science and Water Security, Institute of Aquatic Ecology, Centre for Ecological Research, H-1113 Budapest, Hungary

\* Correspondence: zaray.gyula@ecolres.hu

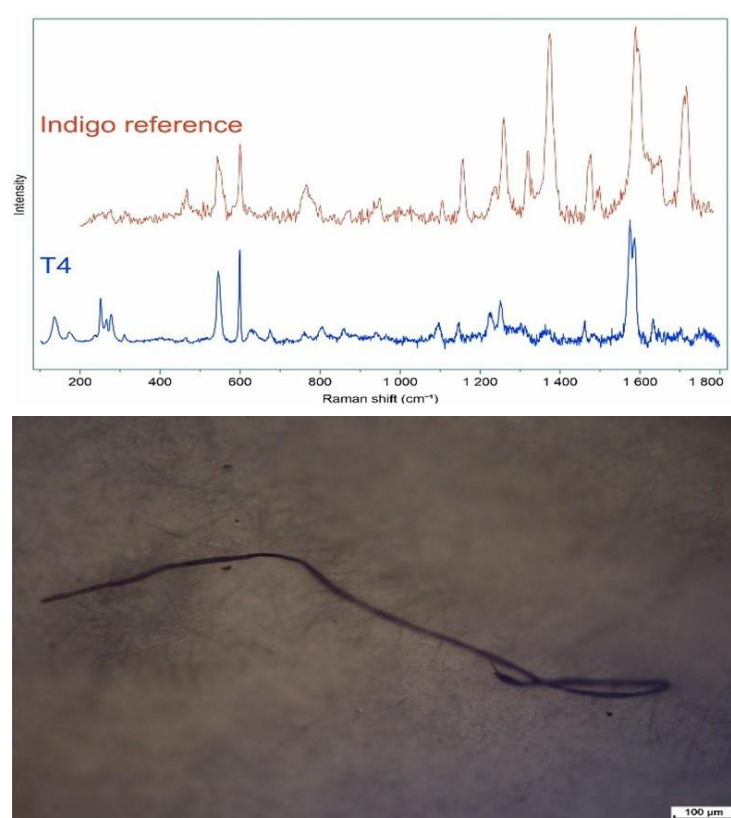

**Figure S1.** Stereomicroscopic picture and Raman spectrum of blue fiber found in *Unio tumidus* mussel collected at sampling site Szeged and Raman spectrum of indigo dye reference material.

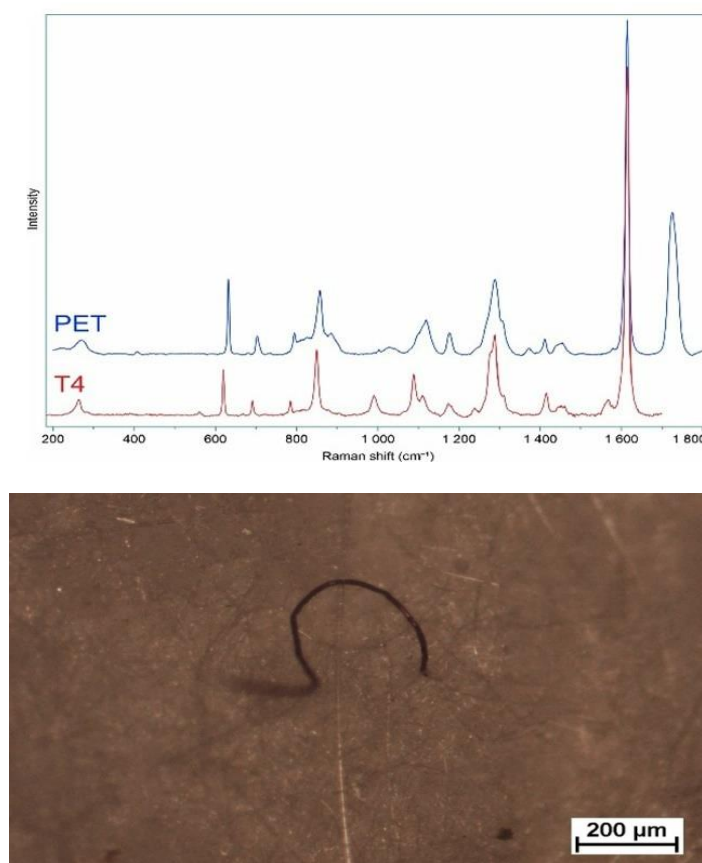

**Figure S2.** Stereomicroscopic picture and Raman spectrum of a fiber found in *Unio tumidus* mussel collected at sampling site Szeged and Raman spectrum of PET reference material.

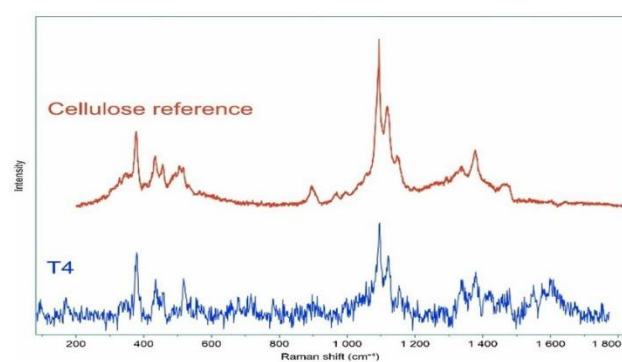

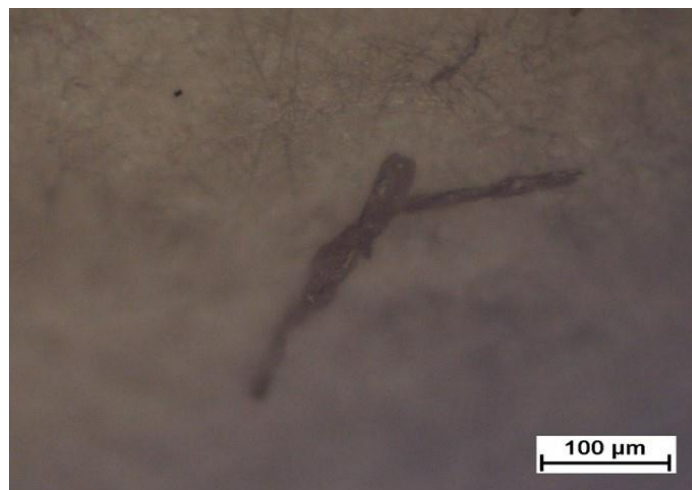

Figure S3. Stereomicroscopic picture and Raman spectrum of a thick fiber found in *Unio tumidus* mussel collected at sampling site Szeged and Raman spectrum of cellulose reference material

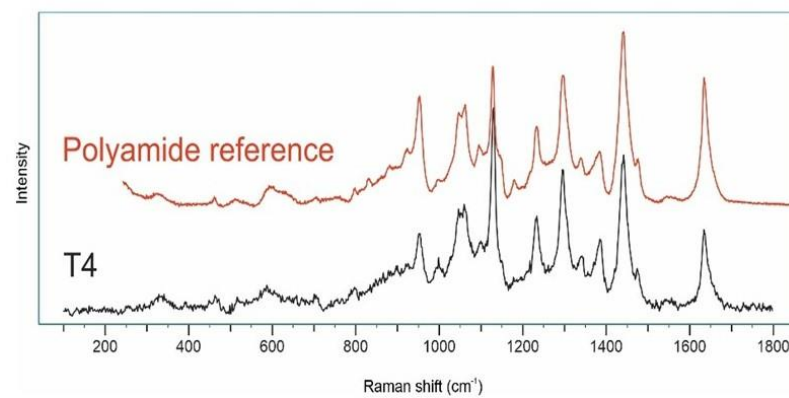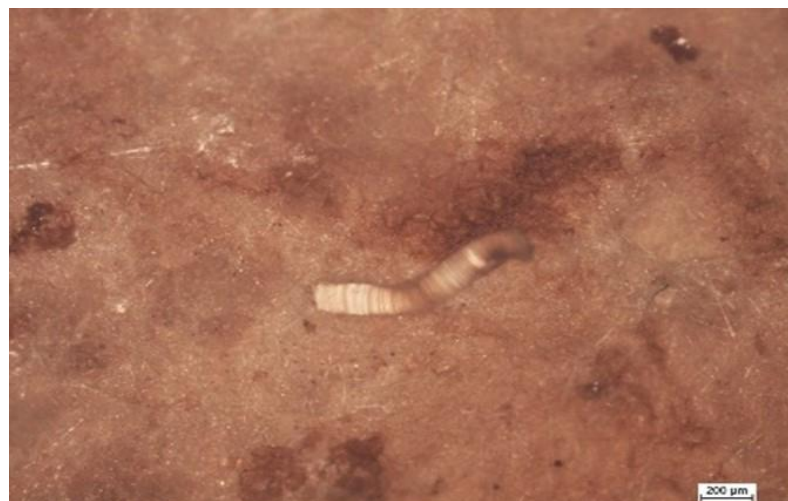

Figure S4. Stereomicroscopic picture and Raman spectrum of a fragment found in *Unio tumidus* mussel collected at sampling site Szeged and Raman spectrum of polyamide reference material.
